# Supplementary material for: Changes in Healthy Behaviors and Meeting 24-h Movement Guidelines in Spanish and Brazilian Preschoolers, Children and Adolescents during the COVID-19 Lockdown
Source: Children (Basel). 2021 Jan 26;8(2):83. doi: 10.3390/children8020083 (PMC7912043; doi:10.3390/children8020083)
Supplement: Supplementary file 1 [file children-08-00083-s001.pdf]

**Table S1.** Changes in physical activity, screen time and sleep duration before and during the COVID-19 lockdown in both Spanish and Brazil samples.

| Variables           | Spain        |                 |                      |        | Brazil       |                 |                      |        |
|---------------------|--------------|-----------------|----------------------|--------|--------------|-----------------|----------------------|--------|
|                     | Pre-lockdown | During lockdown | Dif.                 | p      | Pre-lockdown | During lockdown | Dif.                 | p      |
| <i>Model 1</i>      |              |                 |                      |        |              |                 |                      |        |
| <b>Preschoolers</b> |              |                 |                      |        |              |                 |                      |        |
| PA (weekly days)    | 6.3 (0.1)    | 5.4 (0.2)       | -0.8<br>(-1.2, -0.4) | <0.001 | 5.8 (0.2)    | 4.7 (0.3)       | -1.2<br>(-1.6, -0.8) | <0.001 |
| ST (daily hours)    | 3.7 (0.3)    | 5.2 (0.4)       | -1.5<br>(-1.7, -1.2) | <0.001 | 1.6 (0.2)    | 2.1 (0.3)       | -0.5<br>(-0.6, -0.3) | <0.001 |
| Sleep (daily hours) | 10.3 (0.1)   | 9.9 (0.2)       | -0.4<br>(-0.8, -0.1) | 0.027  | 10.4 (0.1)   | 10.6 (0.1)      | 0.2<br>(-0.1, 0.5)   | 0.173  |
| <b>Children</b>     |              |                 |                      |        |              |                 |                      |        |
| PA (weekly days)    | 5.4 (0.1)    | 4.6 (0.2)       | -0.8<br>(-1.1, -0.6) | <0.001 | 5.3 (0.1)    | 4.2 (0.2)       | -1.1<br>(-1.3, -0.8) | <0.001 |
| ST (daily hours)    | 5.3 (0.2)    | 7.3 (0.3)       | -2.1<br>(-2.2, -1.9) | <0.001 | 3.9 (0.2)    | 4.9 (0.3)       | -1.1<br>(-1.2, -1.0) | <0.001 |
| Sleep (daily hours) | 10.1 (0.1)   | 10.0 (0.1)      | -0.1<br>(-0.1, 0.3)  | 0.221  | 9.9 (0.1)    | 10.2 (0.1)      | 0.3<br>(0.2, 0.5)    | <0.001 |
| <b>Adolescents</b>  |              |                 |                      |        |              |                 |                      |        |
| PA (weekly days)    | 4.4 (0.1)    | 3.8 (0.1)       | -0.5<br>(-0.7, -0.3) | <0.001 | 4.0 (0.1)    | 3.0 (0.2)       | -1.0<br>(-1.3, -0.7) | <0.001 |
| ST (daily hours)    | 8.0 (0.2)    | 11.1 (0.3)      | -3.1<br>(-3.3, -2.9) | <0.001 | 6.5 (16.4)   | 8.3 (0.5)       | -1.8<br>(-2.0, -1.6) | <0.001 |
| Sleep (daily hours) | 8.5 (0.1)    | 9.6 (0.1)       | 1.1<br>(0.9, 1.4)    | <0.001 | 8.9 (0.1)    | 9.5 (0.1)       | 0.6<br>(-0.9, -0.4)  | <0.001 |
| <i>Model 2</i>      |              |                 |                      |        |              |                 |                      |        |
| <b>Total sample</b> |              |                 |                      |        |              |                 |                      |        |
| PA (weekly days)    | 5.0 (0.1)    | 4.3 (0.1)       | -0.7<br>(-0.8, -0.5) | <0.001 | 4.9 (0.1)    | 3.8 (0.1)       | -1.1<br>(-1.2, -0.8) | <0.001 |
| ST (daily hours)    | 6.5 (0.1)    | 9.1 (0.2)       | -2.5<br>(-2.6, -2.4) | <0.001 | 4.5 (0.2)    | 5.8 (0.2)       | -1.3<br>(-1.4, -1.2) | <0.001 |
| Sleep (daily hours) | 9.3 (0.1)    | 9.8 (0.1)       | 0.5<br>(0.4, 0.7)    | <0.001 | 9.6 (0.1)    | 10.0 (0.1)      | 0.4<br>(0.3, 0.5)    | <0.001 |

Data expressed as mean (standard error) or mean differences (95% confident intervals). PA: Physical activity; ST: Screen time. Model 1: Adjusted by sex, breadwinner's educational level, socioeconomic status, BMI (z-score); Model 2: Adjusted by Model 1 + age.

**Table S2.** Changes in the number (proportion) of the sample meeting the 24-h Movement Guideline recommendations before and during the COVID-19 lockdown by country.

| Variables               | Spain        |                 |        | Brazil       |                 |        |
|-------------------------|--------------|-----------------|--------|--------------|-----------------|--------|
|                         | Pre-lockdown | During lockdown | p      | Pre-lockdown | During lockdown | p      |
| <b>Preschoolers</b>     |              |                 |        |              |                 |        |
| PA recommendation       | 52 (67.5)    | 37 (48.1)       | 0.001  | 36 (50.7)    | 24 (33.8)       | 0.002  |
| ST recommendation       | 4 (5.3)      | 3 (4.0)         | 1.000  | 3 (4.2)      | 1 (1.4)         | 0.500  |
| Sleep recommendation    | 56 (74.7)    | 44 (58.7)       | 0.081  | 47 (66.2)    | 54 (76.1)       | 0.167  |
| Meeting 24-h guidelines | 4 (5.3)      | 1 (1.3)         | 0.375  | 20 (28.2)    | 11 (15.5)       | 0.035  |
| <b>Children</b>         |              |                 |        |              |                 |        |
| PA recommendation       | 95 (45.7)    | 73 (35.1)       | 0.001  | 87 (36.1)    | 65 (27.0)       | 0.003  |
| ST recommendation       | 22 (10.6)    | 9 (4.3)         | <0.001 | 7 (3.0)      | 4 (1.7)         | 0.250  |
| Sleep recommendation    | 200 (96.2)   | 175 (84.1)      | <0.001 | 207 (87.7)   | 221 (93.6)      | 0.016  |
| Meeting 24-h guidelines | 13 (6.3)     | N/A             | N/A    | 36 (15.3)    | 24 (10.2)       | 0.036  |
| <b>Adolescents</b>      |              |                 |        |              |                 |        |
| PA recommendation       | 66 (16.4)    | 54 (16.4)       | 0.096  | 30 (15.6)    | 20 (10.4)       | 0.076  |
| ST recommendation       | 13 (4.0)     | 8 (2.5)         | 0.063  | 7 (3.7)      | 6 (3.2)         | 1.000  |
| Sleep recommendation    | 254 (79.1)   | 293 (91.3)      | <0.001 | 145 (77.1)   | 159 (84.6)      | 0.044  |
| Meeting 24-h guidelines | 1 (0.3)      | 1 (0.3)         | 1.000  | 2 (1.1)      | 2 (1.1)         | 1.000  |
| <b>Total sample</b>     |              |                 |        |              |                 |        |
| PA recommendation       | 209 (34.6)   | 160 (26.5)      | <0.001 | 151 (30.5)   | 108 (21.8)      | <0.001 |
| ST recommendation       | 30 (5.0)     | 11 (1.8)        | <0.001 | 124 (25.1)   | 105 (21.2)      | <0.001 |
| Sleep recommendation    | 510 (84.4)   | 512 (84.8)      | 0.937  | 399 (80.6)   | 434 (87.7)      | <0.001 |
| Meeting 24-h guidelines | 18 (3.0)     | 2 (0.3)         | <0.001 | 58 (11.7)    | 37 (7.5)        | 0.002  |

N/A: Not available.
